# Supplementary material for: Highly conductive porous graphene film with excellent folding resilience for exceptional electromagnetic interference shielding
Source: Royal Society of Chemistry journal article supplement (doi:10.1039/d0tc01346c), 2020-01-01
Supplement: d0tc01346c2.pdf [file d0tc01346c2.pdf]

## Supporting Information

### **Highly conductive porous graphene film with excellent folding resilience for exceptional electromagnetic interference shielding**

Dengguo Lai, † Xiaoxiao Chen, † Gang Wang, †, ‡ Xinhai Xu, †, ‡ Yin Wang †, \*

† CAS Key Laboratory of Urban Pollutant Conversion, Institute of Urban Environment,  
Chinese Academy of Sciences, Xiamen 361021, China

‡ University of Chinese Academy of Sciences, Beijing 100049, China

*\*Corresponding author. Tel: +86 592 6190787. E-mail: yinwang@iue.ac.cn (Yin  
Wang).*

## **Experimental details**

### **Synthesis of graphene oxide with pre-oxidization process (PGO).**

$\text{K}_2\text{S}_2\text{O}_8$  (12.5 g) and  $\text{P}_2\text{O}_5$  (12.5 g) were dissolved in concentrated  $\text{H}_2\text{SO}_4$  (60 mL, 98%) at 80°C. And then graphite powder (15 g, 325 mesh, dried at 60°C for 24 h) was added to the acidic solution, and the resulting mixture was stirred at 80°C for 4.5 h. After cooling to room temperature, the solution was diluted with 2.5 L deionized water. The pre-oxidized graphite was obtained by filtration and dried at 100 °C for 12 h. This pretreated graphite powders (12 g) was put into concentrated  $\text{H}_2\text{SO}_4$  (276 mL, 98%) in an ice bath (under 4°C), and then  $\text{NaNO}_3$  (6 g) was added. After that,  $\text{KMnO}_4$  (36 g) was gradually added within 30 min with stirring and keeping under 4°C. The mixture was then heated to 35 °C and kept for 4 h. After, deionized water (552 ml) was added into the mixture and the temperature of reactants was heated to 98°C for 15 min. The reaction was terminated by adding 552 mL deionized water and 30 mL  $\text{H}_2\text{O}_2$  (30%) to reduce Mn(VII) species.

### **Synthesis of conventional graphene oxide (CGO).**

Graphite powder (12 g, 325 mesh, dried at 60°C for 24 h) was added to concentrated  $\text{H}_2\text{SO}_4$  (276 mL) in an ice bath (under 4°C) with vigorous stirring, and followed by the slow addition of  $\text{NaNO}_3$  (6 g). After that,  $\text{KMnO}_4$  (36 g) was added over a period of 30 min and the oxidation was performed over 4 h under 35°C. The following oxidation process initiated by the addition of 552 mL  $\text{H}_2\text{O}$  and kept at 98°C for 15 min. The reaction was terminated by the same method specified in the preparation of PGO.

### **Synthesis of low temperature oxidized graphene oxide (LGO).**

Graphite powder (12 g, 325 mesh, dried at 60°C for 24 h) and  $\text{NaNO}_3$  (6 g) were added to concentrated  $\text{H}_2\text{SO}_4$  (276 mL) in an ice bath with vigorous stirring. After that,  $\text{KMnO}_4$  (36 g) was added over a period of 30 min. The oxidation process was performed over 4 h at 20°C. After that, the reaction was terminated by pouring the reaction system into 1,000 mL 20°C deionized water and the slow addition of 30 mL 30%  $\text{H}_2\text{O}_2$ .

### Exfoliation and purification of the GO samples.

The final mixture was centrifuged and subjected to several cycles of suspension in 10% HCl solution and separated by centrifugation until the pH value of the supernatant reached 7. The resulting solid was re-dispersed in deionized water and exfoliated by mild sonication at 20°C for 10 min, and subjected to dialysis to remove impurities for approximately 7 days. Then brown sticky GO dispersion was obtained. After that, the GO dispersion was diluted and subjected to another 3 cycles of centrifugation at 1000 rpm 20 min for each to remove the graphite powder and unexfoliated graphite oxide agglomerates. Finally, the GO dilute dispersion was concentrated by centrifugation at 10000 rpm for 1 h, generating the GO stock at solid content up to 1 wt.%.

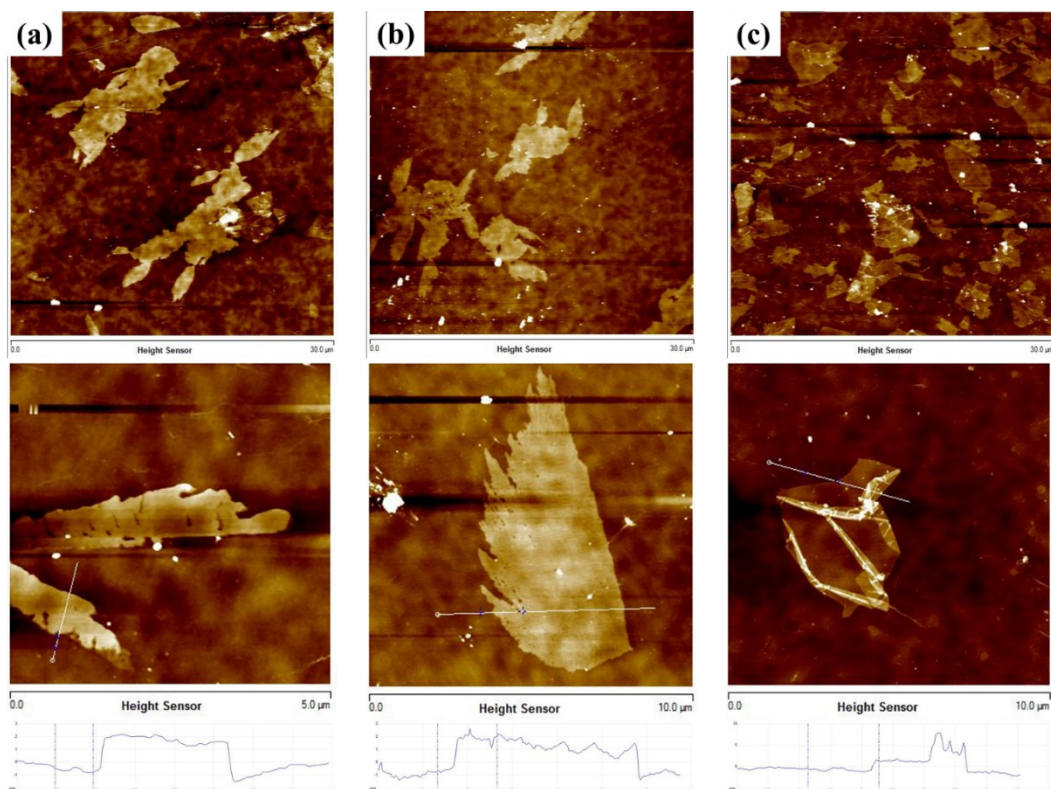

**Figure S1.** Typical AFM images and height profiles of GO sheets: (a) PGO, (b) CGO and (c) LGO.

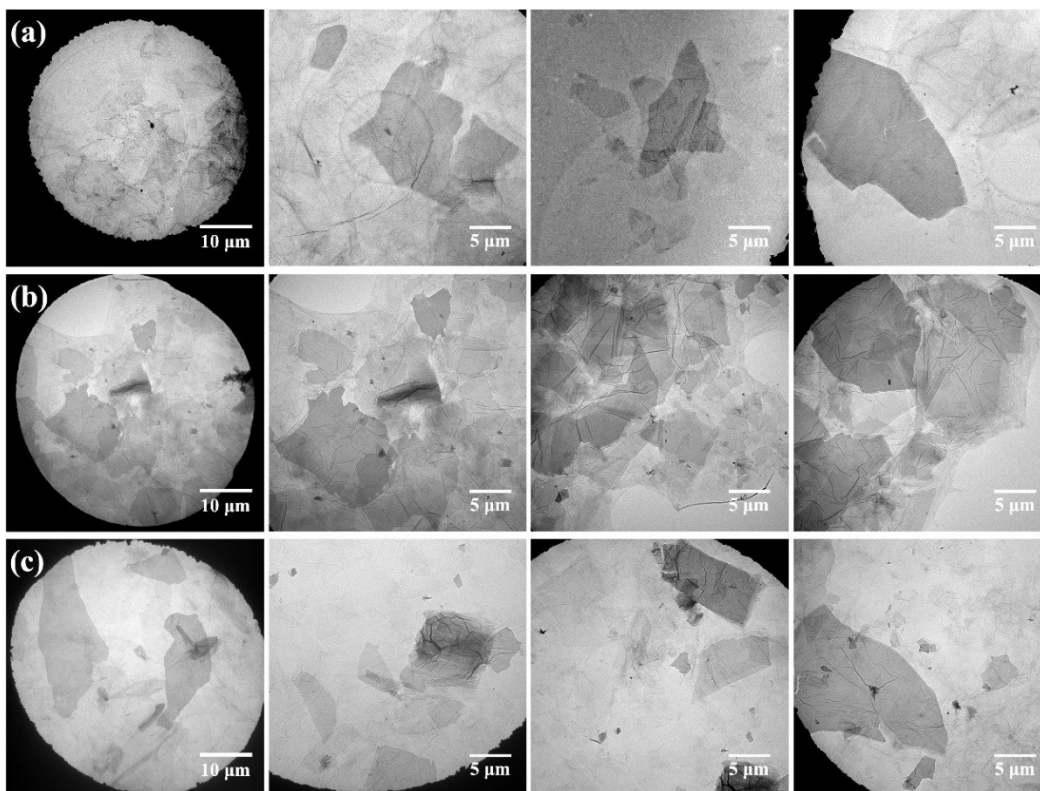

**Figure S2.** Typical TEM images of (a) PGO, (b) CGO and (c) LGO sheets.

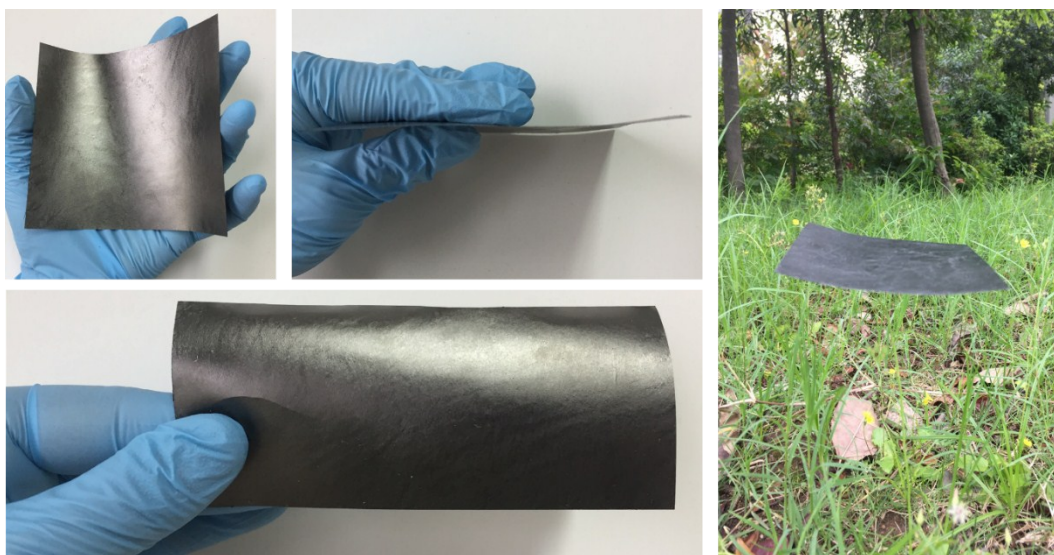

**Figure S3.** Typical photographs of large-scale porous graphene film with a dimension of 100 mm × 100 mm and a thickness of 100 μm.

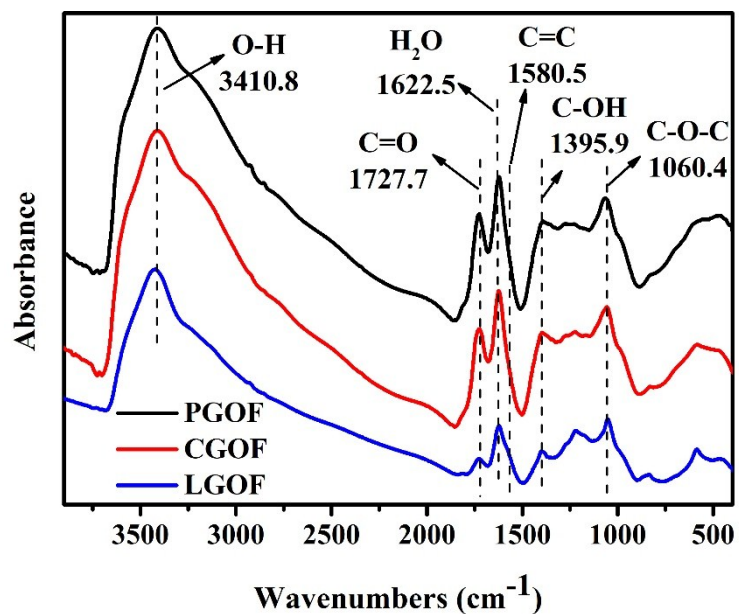

**Figure S4.** FTIR spectra of GO films.

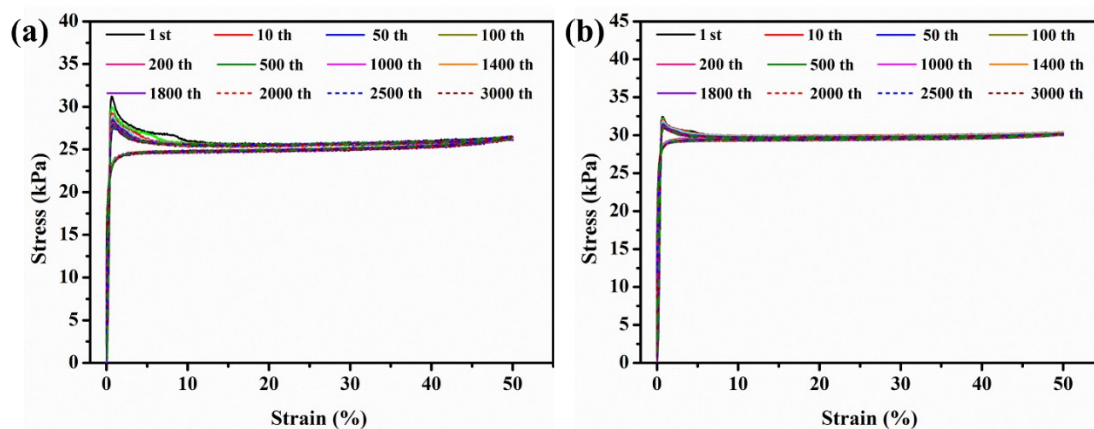

**Figure S5.** The cyclic compressing performance of 200  $\mu\text{m}$ -thick porous graphene films of (a) PPGF and (b) CPGF.

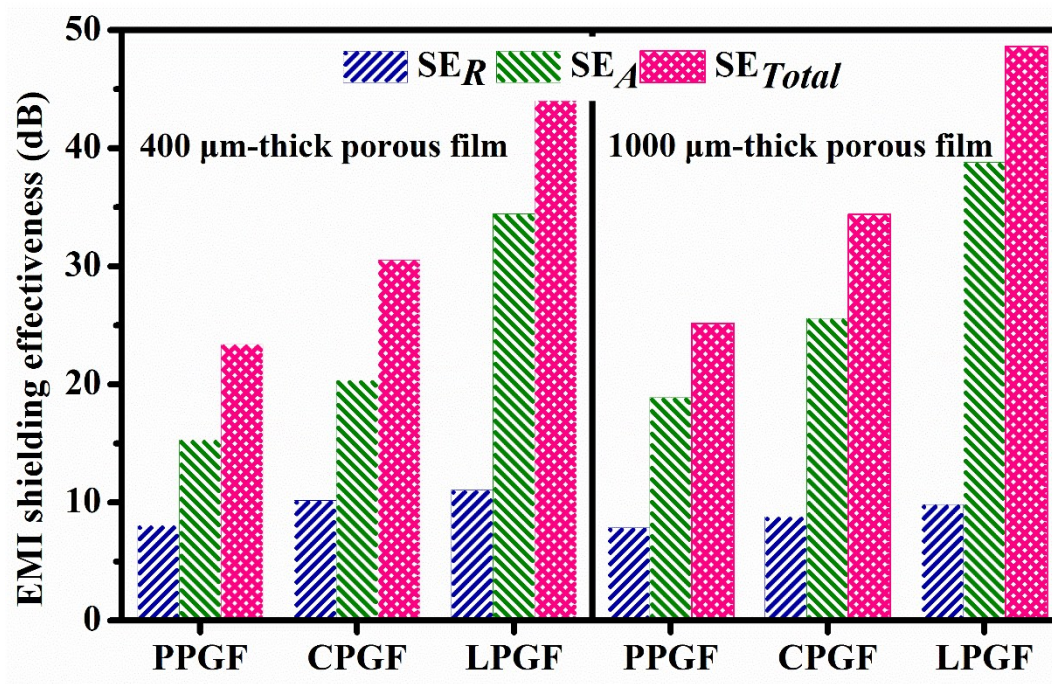

**Figure S6.** The average EMI shielding effectiveness of the porous graphene films with different GO precursors and film thicknesses of 400 and 1000 μm.

**Table S1.** Comparison of the shielding capacity of graphene-based materials.

| Types                            | Materials                                 | Matrix         | Graphene contents<br>(wt.%) | Density<br>(g/cm <sup>3</sup> ) | Thickness<br>(mm) | EMI SE<br>(dB) | SSE/t<br>(dB·cm <sup>2</sup> /g) | Ref.         |             |
|----------------------------------|-------------------------------------------|----------------|-----------------------------|---------------------------------|-------------------|----------------|----------------------------------|--------------|-------------|
| Graphene-polymer solid materials | Graphene                                  | PS             | 7                           | 1.04                            | 2.5               | 45.1           | 173                              | 1            |             |
|                                  | Graphene                                  | PEDOT : PSS    | 25                          | 1.04                            | 0.8               | 70             | 841                              | 2            |             |
|                                  | Graphene                                  | PEI            | 10                          | 1.28                            | 2.3               | 22             | 75                               | 3            |             |
|                                  | Graphene                                  | PMMA           | 8                           | 1.19                            | 3.4               | 30             | 74                               | 4            |             |
|                                  | Graphene                                  | PMMA           | 4.70                        | 1.18                            | 2.9               | 63.2           | 184.7                            | 5            |             |
|                                  | Graphene                                  | WPU            | 7.7                         | 1.43                            | 2                 | 32             | 112                              | 6            |             |
|                                  | Graphene                                  | WPU            | 7.5                         | 1.43                            | 2                 | 34             | 119                              | 7            |             |
|                                  | Graphene                                  | WPU            | 7.5                         | 1.43                            | 2                 | 38             | 133                              | 8            |             |
|                                  | Graphene                                  | PS             | 10                          | 1.04                            | 2                 | 29.7           | 142.8                            | 9            |             |
|                                  | Graphene                                  | PS             | 14.9                        | 1.02                            | 2                 | 24.5           | 120                              | 10           |             |
|                                  | Graphene @ Fe <sub>3</sub> O <sub>4</sub> | PVA            | 35                          | 0.75                            | 0.3               | 15             | 66.7                             | 11           |             |
|                                  | Graphene                                  | PVA            | 15                          | 0.75                            | 0.3               | 10             | 43.3                             | 11           |             |
|                                  | Graphene                                  | UHMWPE         | 1.5                         | 0.94                            | 2.5               | 28.3           | 120                              | 12           |             |
| Graphene films                   | Graphene @ Fe <sub>3</sub> O <sub>4</sub> | /              | Bulk                        | 0.77                            | 0.3               | 24             | 1033                             | 13           |             |
|                                  | Graphene film                             | /              | Bulk                        | 1.09                            | 0.018             | 55             | 28032                            | 14           |             |
|                                  | Graphene film                             | /              | Bulk                        | 0.67                            | 0.05              | 60             | 18300                            | 15           |             |
|                                  | Graphene film                             | /              | Bulk                        | 1.85                            | 0.08              | 77.2           | 5216                             | 16           |             |
|                                  | Graphene film                             | /              | Bulk                        | 2.10                            | 0.0088            | 37             | 20021                            | 17           |             |
| Graphene foams                   | Graphene                                  | PEI            | 10                          | 0.29                            | 2.3               | 12.8           | 191.3                            | 3            |             |
|                                  | Graphene                                  | PS             | 30                          | 0.45                            | 2.5               | 29.3           | 257.6                            | 18           |             |
|                                  | Graphene                                  | PS             | 10                          | 1.04                            | 2.8               | 18             | 62                               | 19           |             |
|                                  | Graphene                                  | PMMA           | 5                           | 0.79                            | 2.4               | 19             | 100                              | 20           |             |
|                                  | Graphene                                  | PI             | 16                          | 0.28                            | 0.8               | 21             | 937.5                            | 21           |             |
|                                  | Graphene @ Fe <sub>3</sub> O <sub>4</sub> | PEI            | 10                          | 0.4                             | 2.5               | 18.2           | 182                              | 22           |             |
|                                  | Graphene                                  | PU             | 10                          | 0.03                            | 20                | 19.9           | 332                              | 23           |             |
|                                  | Graphene aerogel film                     | /              | Bulk                        | 0.41                            | 0.12              | 65             | 13211                            | 24           |             |
|                                  | Porous graphene film                      | /              | Bulk                        | 0.06                            | 0.3               | 25.2           | 14000                            | 25           |             |
|                                  | Graphene aerogel                          | PDMS           | 3.07                        | 1.0                             | 2                 | 54.26          | 271.3                            | 26           |             |
|                                  | Graphene aerogel                          | EPOXY          | 0.33                        | ~1.6                            | 4                 | 35             | 54.7                             | 27           |             |
|                                  | Graphene                                  | PDMS           | 0.8                         | 0.06                            | 1                 | 20             | 3333                             | 28           |             |
|                                  | Graphene                                  | Carbon texture | 42                          | 0.07                            | 1                 | 15             | 2140                             | 29           |             |
|                                  | Graphene                                  | PEDOT : PSS    | 17.85                       | 0.076                           | 1.5               | 91.9           | 8040                             | 30           |             |
|                                  | Graphene                                  | Melamine       | Bulk                        | 0.019                           | 12                | 27.3           | 119                              | 31           |             |
|                                  | Graphene                                  | PU             | 1                           | 0.092                           | 2.5               | 23             | 101                              | 32           |             |
|                                  |                                           | LPGF           | /                           | <b>Bulk</b>                     | <b>0.142</b>      | <b>0.1</b>     | <b>37.43</b>                     | <b>26302</b> |             |
|                                  |                                           | LPGF           | /                           | <b>Bulk</b>                     | <b>0.075</b>      | <b>0.2</b>     | <b>43.82</b>                     | <b>29178</b> | <b>This</b> |
|                                  | CPGF                                      | /              | <b>Bulk</b>                 | <b>0.076</b>                    | <b>0.2</b>        | <b>28.89</b>   | <b>19007</b>                     | <b>work</b>  |             |
|                                  | PPGF                                      | /              | <b>Bulk</b>                 | <b>0.078</b>                    | <b>0.2</b>        | <b>22.00</b>   | <b>14103</b>                     |              |             |

## References

1. Yan, D.-X.; Pang, H.; Li, B.; Vajtai, R.; Xu, L.; Ren, P.-G.; Wang, J.-H.; Li, Z.-M., Structured reduced graphene oxide/polymer composites for ultra-efficient electromagnetic interference shielding. *Adv. Funct. Mater.* **2015**, *25* (4), 559-566.
2. Agnihotri, N.; Chakrabarti, K.; De, A., Highly efficient electromagnetic interference shielding using graphite nanoplatelet/poly(3,4-ethylenedioxythiophene)-poly(styrenesulfonate) composites with enhanced thermal conductivity. *Rsc Adv.* **2015**, *5* (54), 43765-43771.
3. Ling, J.; Zhai, W.; Feng, W.; Shen, B.; Zhang, J.; Zheng, W. G., Facile preparation of lightweight microcellular polyetherimide/graphene composite foams for electromagnetic interference shielding. *ACS Appl. Mater. Interfaces* **2013**, *5* (7), 2677-2684.
4. Zhang, H.-B.; Zheng, W.-G.; Yan, Q.; Jiang, Z.-G.; Yu, Z.-Z., The Effect of Surface Chemistry of Graphene on Rheological and Electrical Properties of Polymethylmethacrylate Composites. *Carbon* **2012**, *50* (14), 5117-5125.
5. Sharif, F.; Arjmand, M.; Moud, A. A.; Sundararaj, U.; Roberts, E. P. L., Segregated Hybrid Poly(methyl methacrylate)/Graphene/Magnetite Nanocomposites for Electromagnetic Interference Shielding. *ACS Appl. Mater. Interfaces* **2017**, *9* (16), 14171-14179.
6. Hsiao, S.-T.; Ma, C.-C. M.; Tien, H.-W.; Liao, W.-H.; Wang, Y.-S.; Li, S.-M.; Huang, Y.-C., Using a Non-Covalent Modification to Prepare a High Electromagnetic Interference Shielding Performance Graphene Nanosheet/Water-borne Polyurethane Composite. *Carbon* **2013**, *60*, 57-66.
7. Hsiao, S.-T.; Ma, C.-C. M.; Liao, W.-H.; Wang, Y.-S.; Li, S.-M.; Huang, Y.-C.; Yang, R.-B.; Liang, W.-F., Lightweight and Flexible Reduced Graphene Oxide/Water-Borne Polyurethane Composites with High Electrical Conductivity and Excellent Electromagnetic Interference Shielding Performance. *ACS Appl. Mater. Interfaces* **2014**, *6* (13), 10667-10678.
8. Hsiao, S.-T.; Ma, C.-C. M.; Tien, H.-W.; Liao, W.-H.; Wang, Y.-S.; Li, S.-M.;



- Yang, C.-Y.; Lin, S.-C.; Yang, R.-B., Effect of Covalent Modification of Graphene Nanosheets on the Electrical Property and Electromagnetic Interference Shielding Performance of a Water-Borne Polyurethane Composite. *ACS Appl. Mater. Interfaces* **2015**, *7* (4), 2817-2826.
9. Shahzad, F.; Lee, S. H.; Hong, S. M.; Koo, C. M., Segregated reduced graphene oxide polymer composite as a high performance electromagnetic interference shield. *Res. Chem. Intermediat.* **2018**, *44* (8), 4707-4719.
10. Shahzad, F.; Yu, S.; Kumar, P.; Lee, J.-W.; Kim, Y.-H.; Hong, S. M.; Koo, C. M., Sulfur doped graphene/polystyrene nanocomposites for electromagnetic interference shielding. *Composite Structures* **2015**, *133*, 1267-1275.
11. Rao, B. V.; Yadav, P.; Aepuru, R.; Panda, H. S.; Ogale, S.; Kale, S. N., Single-Layer Graphene-Assembled 3D Porous Carbon Composites with PVA and Fe<sub>3</sub>O<sub>4</sub> Nano-Fillers: an Interface-Mediated Superior Dielectric and EMI Shielding Performance. *Phys. Chem. Chem. Phys.* **2015**, *17* (28), 18353-18363.
12. Yan, D. X.; Pang, H.; Xu, L.; Bao, Y.; Ren, P. G.; Lei, J.; Li, Z. M., Electromagnetic Interference Shielding of Segregated Polymer Composite with an Ultralow Loading of In Situ Thermally Reduced Graphene Oxide. *Nanotechnology* **2014**, *25* (14), 145705.
13. Song, W.-L.; Guan, X.-T.; Fan, L.-Z.; Cao, W.-Q.; Wang, C.-Y.; Zhao, Q.-L.; Cao, M.-S., Magnetic and conductive graphene papers toward thin layers of effective electromagnetic shielding. *J. Mater. Chem. A* **2015**, *3* (5), 2097-2107.
14. Paliotta, L.; De Bellis, G.; Tamburrano, A.; Marra, F.; Rinaldi, A.; Balijepalli, S. K.; Kaciulis, S.; Sarto, M. S., Highly conductive multilayer-graphene paper as a flexible lightweight electromagnetic shield. *Carbon* **2015**, *89*, 260-271.
15. Zhang, L.; Alvarez, N. T.; Zhang, M.; Haase, M.; Malik, R.; Mast, D.; Shanov, V., Preparation and characterization of graphene paper for electromagnetic interference shielding. *Carbon* **2015**, *82*, 353-359.
16. Xu, F.; Chen, R. F.; Lin, Z. S.; Sun, X. X.; Wang, S. S.; Yin, W. L.; Peng, Q. Y.; Li, Y. B.; He, X. D., Variable densification of reduced graphene oxide foam into multifunctional high-performance graphene paper. *J. Mater. Chem. C* **2018**, *6* (45),

12321-12328.

17. Wang, Z.; Mao, B. Y.; Wang, Q. L.; Yu, J.; Dai, J. X.; Song, R. G.; Pu, Z. H.; He, D. P.; Wu, Z.; Mu, S. C., Ultrahigh conductive copper/large flake size graphene heterostructure thin-film with remarkable electromagnetic interference shielding effectiveness. *Small* **2018**, *14* (20), 1704332 (1-8).

18. Yan, D.-X.; Ren, P.-G.; Pang, H.; Fu, Q.; Yang, M.-B.; Li, Z.-M., Efficient Electromagnetic Interference Shielding of Lightweight Graphene/Polystyrene Composite. *J. Mater. Chem.* **2012**, *22* (36), 18772-18774.

19. Li, C.; Yang, G.; Deng, H.; Wang, K.; Zhang, Q.; Chen, F.; Fu, Q., The Preparation and Properties of Polystyrene/Functionalized Graphene Nanocomposite Foams Using Supercritical Carbon Dioxide. *Polym. Int.* **2012**, 1077-1084.

20. Zhang, H.-B.; Yan, Q.; Zheng, W.-G.; He, Z.; Yu, Z.-Z., Tough Graphene-Polymer Microcellular Foams for Electromagnetic Interference Shielding. *ACS Appl. Mater. Interfaces* **2011**, *3* (3), 918-924.

21. Li, Y.; Pei, X.; Shen, B.; Zhai, W.; Zhang, L.; Zheng, W., Polyimide/graphene composite foam sheets with ultrahigh thermostability for electromagnetic interference shielding. *RSC Adv.* **2015**, *5* (31), 24342-24351.

22. Shen, B.; Zhai, W.; Tao, M.; Ling, J.; Zheng, W., Lightweight, Multifunctional Polyetherimide/Graphene@Fe<sub>3</sub>O<sub>4</sub> Composite Foams for Shielding of Electromagnetic Pollution. *ACS Appl. Mater. Interfaces* **2013**, *5* (21), 11383-11391.

23. Shen, B.; Li, Y.; Zhai, W.; Zheng, W., Compressible graphene-coated polymer foams with ultralow density for adjustable electromagnetic interference (EMI) shielding. *ACS Appl. Mater. Interfaces* **2016**, *8* (12), 8050-8057.

24. Xi, J. B.; Li, Y. L.; Zhou, E. Z.; Liu, Y. J.; Gao, W. W.; Guo, Y.; Ying, J.; Chen, Z. C.; Chen, G. G.; Gao, C., Graphene aerogel films with expansion enhancement effect of high-performance electromagnetic interference shielding. *Carbon* **2018**, *135*, 44-51.

25. Shen, B.; Li, Y.; Yi, D.; Zhai, W.; Wei, X.; Zheng, W., Microcellular graphene foam for improved broadband electromagnetic interference shielding. *Carbon* **2016**, *102*, 154-160.

26. Xu, F.; Chen, R.; Lin, Z.; Qin, Y.; Yuan, Y.; Li, Y.; Zhao, X.; Yang, M.; Sun, X.;

- Wang, S.; Peng, Q.; Li, Y.; He, X., Superflexible Interconnected Graphene Network Nanocomposites for High-Performance Electromagnetic Interference Shielding. *ACS Omega* **2018**, *3* (3), 3599-3607.
27. Chen, Y.; Zhang, H.-B.; Wang, M.; Qian, X.; Dasari, A.; Yu, Z.-Z., Phenolic resin-enhanced three-dimensional graphene aerogels and their epoxy nanocomposites with high mechanical and electromagnetic interference shielding performances. *Composites Science and Technology* **2017**, *152*, 254-262.
28. Chen, Z.; Xu, C.; Ma, C.; Ren, W.; Cheng, H. M., Lightweight and flexible graphene foam composites for high-performance electromagnetic interference shielding. *Adv. Mater.* **2013**, *25* (9), 1296-1300.
29. Song, W.-L.; Guan, X.-T.; Fan, L.-Z.; Cao, W.-Q.; Wang, C.-Y.; Cao, M.-S., Tuning Three-Dimensional Textures with Graphene Aerogels for Ultra-Light Flexible Graphene/Texture Composites of Effective Electromagnetic Shielding. *Carbon* **2015**, *93*, 151-160.
30. Wu, Y.; Wang, Z.; Liu, X.; Shen, X.; Zheng, Q.; Xue, Q.; Kim, J.-K., Ultralight Graphene Foam/Conductive Polymer Composites for Exceptional Electromagnetic Interference Shielding. *ACS Appl. Mater. Interfaces* **2017**, *9* (10), 9059-9069.
31. Liu, C. Z.; Ye, S. B.; Feng, J. C., The Preparation of Compressible and Fire-Resistant Sponge-Supported Reduced Graphene Oxide Aerogel for Electromagnetic Interference Shielding. *Chem-Asian J* **2016**, *11* (18), 2586-2593.
32. Gavvani, J. N.; Adelnia, H.; Zaarei, D.; Gudarzi, M. M., Lightweight flexible polyurethane/reduced ultralarge graphene oxide composite foams for electromagnetic interference shielding. *RSC Adv.* **2016**, *6* (33), 27517-27527.
